# Supplementary material for: A polypyrrole–methyl anthranilate functionalized worm-like titanium dioxide nanocomposite as an innovative tool for immobilization of lipase: preparation, activity, stability and molecular docking investigations
Source: Royal Society of Chemistry journal article supplement (doi:10.1039/c7nj02951a), 2017-11-13
Supplement: c7nj02951a1.pdf [file c7nj02951a1.pdf]

**Table S1. Immobilization of lipase on Ppy/MA/TiO<sub>2</sub>-NC; a) covalent immobilized lipase preparation, b) physically adsorbed lipase**

| Immobilized enzyme preparation, X, (U) | Enzyme activity in washes, Y, (U) | Enzyme activity bound    |               | Effectiveness factor, B/A = η | Activity yield (%), B/A×100 |
|----------------------------------------|-----------------------------------|--------------------------|---------------|-------------------------------|-----------------------------|
|                                        |                                   |                          |               |                               |                             |
|                                        |                                   | Theoretical X-Y = A, (U) | Actual B, (U) |                               |                             |
| a) 17.3                                | 1.1                               | 16.2                     | 15.7          | 0.97                          | 97                          |
| b) 17.3                                | 1.4                               | 15.9                     | 13.7          | 0.86                          | 86                          |

Each value represents the mean for three independent experiments performed in triplicates, with average standard deviations, < 5%.

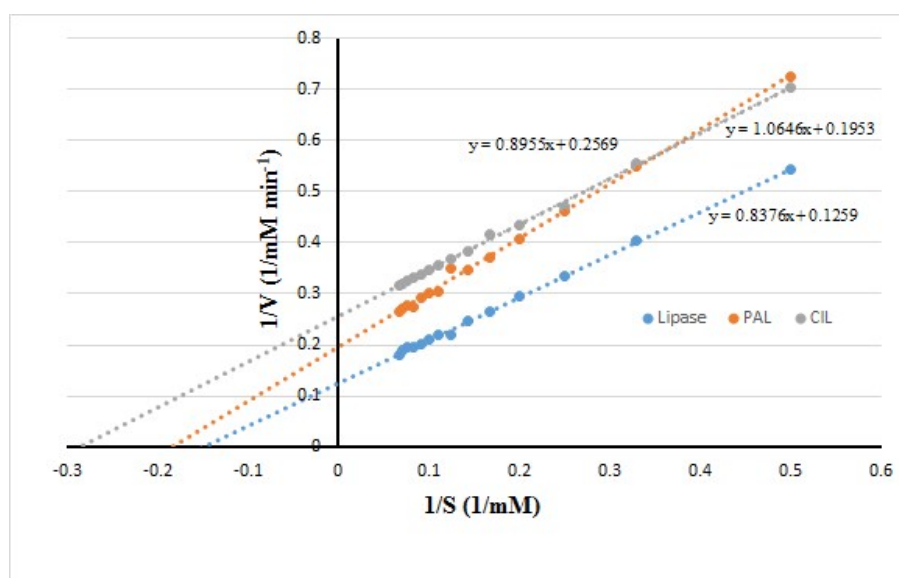

**Figure S1. Double reciprocal plot for lipase , physically adsorbed and covalently immobilized lipase.**
